# Supplementary material
Source: PubMed Central journal article supplement (PMC5479308)
Supplement: NIHMS863906-supplement-1.pdf [file NIHMS863906-supplement-1.pdf]

## Supplemental Results

### *More fixation analysis*

We next computed the percentage of the number of fixations in each ROI (**Fig. 3I**). Participants with ASD did not differ from controls in the eye (ASD:  $28.5 \pm 19.2\%$ , controls:  $33.6 \pm 20.1\%$ ;  $t(31)=0.74$ ,  $P=0.46$ ,  $g=0.25$ , permutation  $P=0.46$ ), mouth (ASD:  $21.5 \pm 13.9\%$ , controls:  $19.3 \pm 13.9\%$ ;  $t(31)=0.45$ ,  $P=0.66$ ,  $g=0.15$ , permutation  $P=0.64$ ), or center (ASD:  $41.1 \pm 16.2\%$ , controls:  $42.3 \pm 13.2\%$ ;  $t(31)=0.23$ ,  $P=0.82$ ,  $g=0.078$ , permutation  $P=0.84$ ) ROIs, nor the difference between the eye and mouth ROI (ASD:  $7.08 \pm 31.4\%$ , controls:  $14.3 \pm 32.3\%$ ;  $t(31)=0.65$ ,  $P=0.52$ ,  $g=0.22$ , permutation  $P=0.52$ ). Similar results were derived for the total fixation duration in each ROI (**Fig. 3J**; eye: ASD:  $275 \pm 220$  ms, controls:  $344 \pm 226$  ms;  $t(31)=0.88$ ,  $P=0.38$ ,  $g=0.30$ , permutation  $P=0.38$ ; mouth: ASD:  $229 \pm 167$  ms, controls:  $221 \pm 184$  ms;  $t(31)=0.14$ ,  $P=0.89$ ,  $g=0.048$ , permutation  $P=0.84$ ; center: ASD:  $399 \pm 180$  ms, controls:  $374 \pm 142$  ms;  $t(31)=0.44$ ,  $P=0.66$ ,  $g=0.15$ , permutation  $P=0.61$ ; difference between eye and mouth: ASD:  $45.7 \pm 365$  ms, controls:  $123 \pm 387$  ms;  $t(31)=0.59$ ,  $P=0.56$ ,  $g=0.20$ , permutation  $P=0.53$ ). Both results mirrored that of fixation density.

Furthermore, participants with ASD and controls showed similar orientation speed towards all ROIs (**Fig. 3K**; eye: ASD:  $370 \pm 177$  ms, controls:  $349 \pm 169$  ms;  $t(31)=0.35$ ,  $P=0.73$ ,  $g=0.12$ , permutation  $P=0.72$ ; mouth: ASD:  $376 \pm 158$  ms, controls:  $435 \pm 170$  ms;  $t(30)=1.02$ ,  $P=0.32$ ,  $g=0.35$ , permutation  $P=0.35$ ; center: ASD:  $76.3 \pm 66.6$  ms, controls:  $64.7 \pm 89.4$  ms;  $t(31)=0.43$ ,  $P=0.67$ ,  $g=0.15$ , permutation  $P=0.73$ ; difference between eye and mouth: ASD:  $11 \pm 289$  ms, controls:  $-85.6 \pm 310$  ms;  $t(30)=0.91$ ,  $P=0.37$ ,  $g=0.32$ , permutation  $P=0.38$ ). Notably, both participants with ASD (two-tailed paired t-test;  $t(16)=0.16$ ,  $P=0.88$ ,  $g=0.033$ , permutation  $P=0.93$ ) and controls ( $t(14)=1.07$ ,  $P=0.30$ ,  $g=0.49$ , permutation  $P=0.18$ ) showed similar latency to first fixate on eyes and mouth. This was further confirmed by a two-way ANOVA (ASD vs. controls X eye vs. mouth) showing no difference between participant groups ( $F(1,61)=0.20$ ,  $P=0.66$ ,  $\eta^2=0.0033$ ), ROI types ( $F(1,61)=1.18$ ,  $P=0.28$ ,  $\eta^2=0.019$ ), nor interaction ( $F(1,61)=0.91$ ,  $P=0.34$ ,  $\eta^2=0.014$ ).

Lastly, participants with ASD did not differ in mean fixation duration in each ROI from controls (**Fig. 3L**; eye: ASD:  $270 \pm 87.5$  ms, controls:  $267 \pm 78.5$  ms;  $t(31)=0.12$ ,  $P=0.91$ ,  $g=0.041$ , permutation  $P=0.96$ ; mouth: ASD:  $315 \pm 133$  ms, controls:  $328 \pm 137$  ms;  $t(30)=0.28$ ,  $P=0.78$ ,  $g=0.10$ , permutation  $P=0.77$ ; center: ASD:  $299 \pm 107$  ms, controls:  $269 \pm 68.2$  ms;  $t(31)=0.92$ ,  $P=0.37$ ,  $g=0.31$ , permutation  $P=0.41$ ; difference between eye and mouth: ASD:  $-51.5 \pm 153$  ms, controls:  $-60.8 \pm 204$  ms;  $t(30)=0.15$ ,  $P=0.88$ ,  $g=0.051$ , permutation  $P=0.86$ ).
